# Supplementary material
Source: HighWire-hosted journal article supplement (https://www.canjsurg.ca/highwire/filestream/96834/field_highwire_adjunct_files/0/cjs-015017-1-at.pdf)
Supplement: cjs-015017-1-at.pdf [file cjs-015017-1-at.pdf]

instrument: the SMARt Wound Tool. *Can J Surg* 2018.

DOI: 10.1503/cjs.015017

Copyright © 2018 The Author(s) or their employer(s).

To receive this resource in an accessible format, please contact us at [cmajgroup@cmaj.ca](mailto:cmajgroup@cmaj.ca).

*Online appendices are unedited and posted as supplied by the authors.*

## **Appendix 1 – Search strategy**

MEDLINE: [(((heal\* or healing) and (wound\* or incision\*)).mp.) or (exp Wound Healing/)] AND [(((surgical or surg\*) adj5 (incision\* or wound\*)).mp.) or (exp Surgical Procedures, Operative/ or exp Orthopedic Procedures/)] AND [(acute.mp.) or (primary intention.mp.)] AND [(tool\* or indices or scale\* or outcome\* or assessment\* or criteria).mp.]

CINAHL: [(((heal\* or healing) and (wound\* or incision\*)).mp.) or (exp Wound Healing/)] AND [(((surgical or surg\*) n5 (incision\* or wound\*)).mp.) or (exp Surgical Procedures, Operative/ or exp Orthopedic Procedures/)] AND [(acute.mp.) or (primary intention.mp.)] AND [(tool\* or indices or scale\* or outcome\* or assessment\* or criteria).mp.]

EMBASE: [(((heal\* or healing) and (wound\* or incision\*)).mp.) or (exp wound healing/)] AND [(((surgical or surg\*) adj5 (incision\* or wound\*)).mp.) or (exp surgical technique/ or (surgical procedure.mp.))] AND [(acute.mp.) or (primary intention.mp.)] AND [(tool\* or indices or scale\* or outcome\* or assessment\* or criteria).mp.]

COCHRANE RCTs:[(((heal\* or healing) and (wound\* or incision\*)).mp.) or (exp Wound Healing/)] AND [(((surgical or surg\*) adj5 (incision\* or wound\*)).mp.) or (surgical procedures.mp.)] AND [(acute.mp.) or (primary intention.mp.)] AND [(tool\* or indices or scale\* or outcome\* or assessment\* or criteria).mp.]

COCHRANE REVIEWS:[(((heal\* or healing) and (wound\* or incision\*)).mp.) or (wound healing)] AND [(((surgical or surg\*) adj5 (incision\* or wound\*)).mp.) or (surgical procedures)] AND [(acute) or (primary intention)] AND [(tool\* or indices or scale\* or outcome\* or assessment\* or criteria).mp.]
